# Supplementary material for: Genetic Risk Assessment of Nonsyndromic Cleft Lip with or without Cleft Palate by Linking Genetic Networks and Deep Learning Models
Source: MDPI journal article supplement (doi:10.3390/ijms24054557), 2023-02-25
Supplement: s1 [file s1]

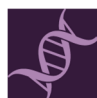

**Table S1.** Pairwise linkage disequilibrium estimated among 92 candidate SNPs ( $r^2 > 0.8$ )

| Chr. | SNP - SNP             | $r^2$ | Chr. | SNP - SNP              | $r^2$ |
|------|-----------------------|-------|------|------------------------|-------|
| 1    | rs1537514 - rs2274976 | 1.00  | 2    | rs765871 - rs3771498   | 0.89  |
|      | rs2235375 - rs2013162 | 0.98  | 4    | rs698 - rs1693482      | 1.00  |
|      | rs3737967 - rs1537514 | 0.96  | 5    | rs7713638 - rs7715100  | 1.00  |
|      | rs3737967 - rs2274976 | 0.96  | 6    | rs910586 - rs2819861   | 1.00  |
|      | rs1537514 - rs3753582 | 0.93  | 11   | rs3935406 - rs10892434 | 0.87  |
|      | rs2274976 - rs3753582 | 0.93  | 14   | rs3917192 - rs3917187  | 0.81  |
|      | rs3737967 - rs3753582 | 0.89  |      |                        |       |
|      | rs2235373 - rs2235371 | 0.80  |      |                        |       |

Chr., chromosome;  $r^2$ , r-squared measure of linkage disequilibrium; SNP, single nucleotide polymorphism

**Table S2.** Number of SNPs used in the models for NSCL/P risk prediction in three SNP settings using genetic algorithm neural-optimized networks ensemble method.

| Gene         | SNP ID     | NR/R | RAF (%)      | OR   | <i>p</i> -value      | GANNET (Count) |         |        |
|--------------|------------|------|--------------|------|----------------------|----------------|---------|--------|
|              |            |      | Case/Control |      |                      | 16-SNPs        | 10-SNPs | 3-SNPs |
| <i>MTHFR</i> | rs1537514  | G/C  | 0.94/0.89    | 1.83 | 0.06                 | 3              | 1       | -      |
|              | rs1801133  | C/T  | 0.43/0.40    | 1.13 | 0.53                 | 1              | 4       | -      |
|              | rs3753582  | G/T  | 0.94/0.88    | 1.99 | 0.03                 | 1              | 2       | -      |
|              | rs9651118  | T/C  | 0.35/0.32    | 1.12 | 0.58                 | -              | 4       | -      |
|              | rs1801131  | C/A  | 0.85/0.79    | 1.50 | 0.09                 | 2              | -       | -      |
|              | rs2274976  | A/G  | 0.94/0.89    | 1.83 | 0.06                 | 1              | -       | -      |
| <i>ABCA4</i> | rs481931   | A/C  | 0.64/0.57    | 1.32 | 0.13                 | 4              | 2       | -      |
|              | rs4147871  | T/C  | 0.05/0.03    | 1.37 | 0.51                 | 1              | -       | -      |
| <i>ARNT</i>  | rs11204737 | C/T  | 0.51/0.40    | 1.55 | 0.01                 | 2              | 1       | 1      |
|              | rs16827741 | C/T  | 0.09/0.08    | 1.27 | 0.53                 | 3              | -       | 1      |
| <i>IRF6</i>  | rs7517566  | A/G  | 0.81/0.75    | 1.45 | 0.09                 | 1              | -       | -      |
|              | rs1044516  | A/C  | 0.56/0.42    | 1.73 | 2.1×10 <sup>-3</sup> | 2              | 4       | 3      |
|              | rs17317411 | T/C  | 0.03/0.03    | 1.04 | 1.00                 | 2              | 1       | -      |
|              | rs2013162  | A/C  | 0.53/0.39    | 1.78 | 1.5×10 <sup>-3</sup> | 4              | 6       | 1      |
|              | rs2235371  | T/C  | 0.72/0.58    | 1.93 | 4.4×10 <sup>-4</sup> | 2              | 1       | 1      |
|              | rs2235373  | A/G  | 0.67/0.51    | 1.91 | 3.5×10 <sup>-4</sup> | 1              | 2       | 1      |
|              | rs595918   | G/A  | 0.21/0.13    | 1.76 | 0.02                 | 1              | 3       | -      |
|              | rs2235375  | C/G  | 0.53/0.39    | 1.74 | 2.1×10 <sup>-3</sup> | 1              | -       | 1      |
|              | rs599021   | A/C  | 0.31/0.26    | 1.29 | 0.21                 | 2              | -       | -      |
| <i>TGFA</i>  | rs3755377  | C/T  | 0.47/0.40    | 1.29 | 0.16                 | -              | 1       | -      |
|              | rs3771485  | G/C  | 0.43/0.38    | 1.26 | 0.21                 | 4              | 2       | -      |
|              | rs3771498  | A/G  | 0.41/0.34    | 1.35 | 0.10                 | 1              | -       | -      |
|              | rs3821272  | C/T  | 0.72/0.66    | 1.30 | 0.18                 | 2              | -       | -      |
|              | rs11466212 | C/T  | 0.91/0.89    | 1.23 | 0.56                 | -              | -       | 1      |
| <i>MSX1</i>  | rs3821949  | G/A  | 0.48/0.47    | 1.02 | 0.93                 | 1              | -       | -      |
|              | rs4464513  | T/G  | 0.72/0.71    | 1.05 | 0.85                 | 4              | -       | -      |
| <i>ADH1C</i> | rs2241894  | G/A  | 0.16/0.14    | 1.22 | 0.46                 | 1              | -       | -      |
| <i>TCOF1</i> | rs7715100  | A/G  | 0.09/0.04    | 2.28 | 0.04                 | 1              | 1       | 1      |
|              | rs15251    | T/C  | 0.84/0.80    | 1.32 | 0.25                 | 2              | -       | -      |
|              | rs2255796  | C/T  | 0.44/0.42    | 1.07 | 0.72                 | -              | -       | 1      |
| <i>RUNX2</i> | rs16873348 | T/C  | 0.35/0.26    | 1.56 | 0.02                 | 4              | 4       | 1      |
|              | rs1934328  | T/A  | 0.77/0.70    | 1.45 | 0.07                 | 5              | -       | -      |
|              | rs2819861  | T/C  | 0.96/0.92    | 1.98 | 0.09                 | 3              | -       | -      |
| <i>VAX1</i>  | rs7078160  | G/A  | 0.52/0.50    | 1.09 | 0.66                 | -              | 2       | -      |
| <i>PVRL1</i> | rs7103685  | C/T  | 0.66/0.63    | 1.15 | 0.46                 | -              | 4       | 1      |
|              | rs906830   | T/C  | 0.55/0.50    | 1.18 | 0.38                 | 1              | 2       | -      |
|              | rs7129848  | C/T  | 0.24/0.21    | 1.25 | 0.3                  | 3              | -       | -      |
|              | rs7940667  | A/C  | 0.97/0.95    | 1.78 | 0.2                  | 2              | -       | -      |
|              | rs931953   | A/G  | 0.47/0.47    | 1.01 | 1.00                 | 1              | -       | -      |
|              | rs10790330 | G/A  | 0.50/0.45    | 1.24 | 0.22                 | -              | -       | 1      |
| <i>PAX9</i>  | rs2295221  | A/G  | 0.06/0.05    | 1.03 | 1.00                 | 1              | 1       | -      |
|              | rs11156925 | G/A  | 0.70/0.70    | 1.03 | 0.92                 | 2              | -       | -      |
|              | rs17104939 | C/T  | 0.26/0.26    | 1.03 | 0.92                 | 1              | -       | -      |

|       |            |     |           |      |      |   |   |   |
|-------|------------|-----|-----------|------|------|---|---|---|
|       | rs17104944 | T/G | 0.78/0.76 | 1.09 | 0.68 | 2 | - | - |
| TGFB3 | rs2284791  | G/C | 0.45/0.36 | 1.48 | 0.03 | 4 | 2 | - |
|       | rs3917192  | G/A | 0.49/0.40 | 1.47 | 0.03 | 1 | 5 | 2 |
|       | rs4252328  | G/A | 0.50/0.43 | 1.35 | 0.09 | 5 | 1 | - |
|       | rs3917211  | A/G | 0.34/0.30 | 1.2  | 0.35 | 1 | - | 1 |
| MAFB  | rs13041247 | C/T | 0.59/0.51 | 1.42 | 0.05 | 1 | - | - |
|       | rs6029273  | A/G | 0.41/0.36 | 1.21 | 0.32 | 3 | - | - |
| TBX22 | rs11796677 | T/C | 0.50/0.46 | 1.16 | 0.53 | 3 | 1 | - |
|       | rs1429591  | C/A | 0.37/0.30 | 1.41 | 0.13 | 1 | 3 | - |
|       | rs195291   | T/A | 0.89/0.84 | 1.47 | 0.23 | 2 | - | - |

GANNET, genetic algorithm neural network ensemble technique; NR/R, non-risk/risk allele; OR, odds ratio; RAF, risk allele frequency; SNP, single nucleotide polymorphism. *P*-values were obtained by the Fisher's exact test using PLINK.
